# Supplementary material
Source: HighWire-hosted journal article supplement (https://www.annals.org/content/suppl/2006/12/08/145.12.901)
Supplement: Balk_DB_145-12-901-DC1-1.pdf [file Balk_DB_145-12-901-DC1-1.pdf]

**Table 1. Summary of Reviewed Studies**

| Study Type                           | Intervention                                                                                                              | Studies,<br><i>n</i> | Quality, <i>n</i> |      |      | Applicability, <i>n</i> |          |     | Participants,<br><i>n</i> | Years of<br>Intervention |
|--------------------------------------|---------------------------------------------------------------------------------------------------------------------------|----------------------|-------------------|------|------|-------------------------|----------|-----|---------------------------|--------------------------|
|                                      |                                                                                                                           |                      | Good              | Fair | Poor | High                    | Moderate | Low |                           |                          |
| Randomized trials                    | Angioplasty with stent placement versus medical therapy                                                                   | 0                    |                   |      |      |                         |          |     |                           |                          |
| Randomized trials                    | Angioplasty without stent placement or combination of angioplasty with and without stent placement versus medical therapy | 2*                   |                   | 2    |      |                         | 1        | 1   | 103                       | 1992–1995‡               |
| Comparison studies†                  | Revascularization versus medical therapy                                                                                  | 8*                   |                   | 2    | 6    | 1                       |          | 7   | 597                       | 1981–2003‡               |
| Cohort studies                       | Medical treatment                                                                                                         | 4                    |                   | 1    | 3    |                         | 1        | 3   | 83                        | Not reported             |
| Cohort studies                       | Natural history                                                                                                           | 8                    |                   | 3    | 5    |                         | 3        | 5   | 721                       | 1970–1998‡               |
| Cohort studies                       | Angioplasty with stent placement                                                                                          | 21                   |                   | 10   | 11   | 2                       | 14       | 5   | 3368                      | 1989–2002‡               |
| Cohort studies                       | Angioplasty with and without stent placement                                                                              | 4                    |                   | 3    | 1    | 1                       | 2        | 1   | 427                       | 1993–1999                |
| Cohort studies                       | Surgical revascularization                                                                                                | 4                    |                   |      | 4    |                         |          | 4   | 921                       | 1980–2004                |
| Studies that reported adverse events |                                                                                                                           | 37                   |                   |      |      |                         |          |     | 5378                      |                          |

\* One study had both a randomized and nonrandomized component.

† Combination angioplasty and surgery or surgery versus medical therapy (randomized or nonrandomized study), or angioplasty versus medical therapy in a nonrandomized study.

‡ Some studies did not report the intervention years.
