# Supplementary material
Source: HighWire-hosted journal article supplement (https://www.annals.org/content/suppl/2006/12/08/145.12.901)
Supplement: Balk_DB_145-12-901-DC1-2.pdf [file Balk_DB_145-12-901-DC1-2.pdf]

**Table 2. Effects of Renal Artery Revascularization versus Medical Treatment Alone on Clinical Outcomes**

| Outcomes              | Strength of Evidence | Studies (Participants), <i>n</i> |                           |                | Conclusions                                                                                                                                                                                                                                                                                                                      |
|-----------------------|----------------------|----------------------------------|---------------------------|----------------|----------------------------------------------------------------------------------------------------------------------------------------------------------------------------------------------------------------------------------------------------------------------------------------------------------------------------------|
|                       |                      | Randomized Trials                | Other Comparative Studies | Cohort Studies |                                                                                                                                                                                                                                                                                                                                  |
| Death                 | Weak                 | 1 (55)                           | 4 (381)                   | 30 (4646)      | No large difference in mortality up to about 5 years between revascularization and medical treatment                                                                                                                                                                                                                             |
| Kidney function       | Acceptable           | 2 (103)                          | 7 (428)                   | 34 (4916)      | No substantial difference in kidney function; improvements in kidney function were reported in cohort studies only among patients receiving revascularization                                                                                                                                                                    |
| Blood pressure        | Acceptable           | 2 (103)                          | 8 (597)                   | 34 (4275)      | Some evidence that blood pressure may be lowered more after angioplasty than with medical treatment alone, particularly among patients with bilateral disease (range, no difference to 26/10 mm Hg lower after angioplasty); cure of hypertension was reported in cohort studies only among patients receiving revascularization |
| Cardiovascular events | Weak                 | 1 (55)                           | 1 (52)                    | 3 (560)        | No large differences found in comparative studies up to about 4 years                                                                                                                                                                                                                                                            |
| Adverse events        | Weak                 | 2 (103)                          | 4 (323)                   | 31 (4906)      | Evidence does not support meaningful conclusions about relative adverse events or complications from angioplasty compared with medical treatment                                                                                                                                                                                 |
