# Supplementary material
Source: HighWire-hosted journal article supplement (https://www.annals.org/content/suppl/2006/12/08/145.12.901)
Supplement: Balk_DB_145-12-901-DC1-3.pdf [file Balk_DB_145-12-901-DC1-3.pdf]

**Table 3. Direct Comparisons of Angioplasty or Surgery and Medical Treatment for Renal Artery Stenosis\***

| Author, Year (Reference)                                           | Study Design                 | Intervention                                                              | Patients with Renal Artery Stenosis (Patients with Atherosclerotic Renal Artery Stenosis), <i>n</i> | Mean Blood Pressure, mm Hg | Mean Glomerular Filtration Rate, mL/s (mL/min) | Mean Serum Creatinine Concentration $\mu\text{mol/L}$ (mg/dL) | Mean Degree of Stenosis (Patients with Bilateral Stenosis), % |
|--------------------------------------------------------------------|------------------------------|---------------------------------------------------------------------------|-----------------------------------------------------------------------------------------------------|----------------------------|------------------------------------------------|---------------------------------------------------------------|---------------------------------------------------------------|
| <b>Angioplasty versus medical treatment</b>                        |                              |                                                                           |                                                                                                     |                            |                                                |                                                               |                                                               |
| Webster et al., 1998 (10)                                          | Randomized trial             | Angioplasty, no stent placement                                           | 12 (12)                                                                                             | 190/99                     | NR                                             | 182 (2.1)                                                     | >50 (100)                                                     |
|                                                                    |                              | 2 or 3 agents (atenolol, bedrofluazide, calcium-channel blockers)‡        | 16 (16)                                                                                             | 190/101                    | NR                                             | 148 (1.7)                                                     |                                                               |
| Patients with unilateral disease                                   |                              | Angioplasty, no stent placement                                           | 13 (13)                                                                                             | 189/105                    | NR                                             | 138 (1.6)                                                     | >50 (0)                                                       |
|                                                                    |                              | 2 or 3 agents (atenolol, bedrofluazide, calcium-channel blockers)‡        | 14 (14)                                                                                             | 182/99                     | NR                                             | 168 (1.9)                                                     |                                                               |
| Plouin et al., 1998 (11)                                           | Randomized trial             | Angioplasty, with or without stent placement                              | 23 (23)                                                                                             | 165/98                     | 1.2 (73)                                       | —                                                             | >60 (0)                                                       |
|                                                                    |                              | Multiple drug regimens                                                    | 25 (25)                                                                                             | 165/96                     | 1.2 (73)                                       | —                                                             |                                                               |
| <b>Angioplasty versus medical treatment or delayed angioplasty</b> |                              |                                                                           |                                                                                                     |                            |                                                |                                                               |                                                               |
| Krijnen et al., 2004 (12); van Jaarsveld et al., 2000 (13, 14)     |                              | Angioplasty, no stent placement                                           | 56 (56)                                                                                             | 179/104                    | 1.1 (67)                                       | —                                                             | 76 (23)                                                       |
|                                                                    |                              | Multiple drug regimens (28 patients) or delayed angioplasty (22 patients) | 50 (50)                                                                                             | 180/103                    | 1.0 (60)                                       | —                                                             | 72 (22)                                                       |
| <b>Angioplasty versus medical treatment</b>                        |                              |                                                                           |                                                                                                     |                            |                                                |                                                               |                                                               |
| Webster et al., 1998 (10)                                          | Nonrandomized, prospective   | Angioplasty, no stent placement                                           | 28 (28)                                                                                             | 196/109                    | NR                                             | 169 (1.9)                                                     | >50 (NR)                                                      |
|                                                                    |                              | 2 or 3 agents (bedrofluazide, calcium-channel blocker)                    | 51 (51)                                                                                             | 197/103                    | NR                                             | 144 (1.6)                                                     |                                                               |
| Taylor et al., 1989 (15)                                           | Nonrandomized, prospective   | Angioplasty, no stent placement                                           | 5 (NR)                                                                                              | 160/96                     | NR                                             | NR                                                            | >60 (NR)                                                      |
|                                                                    |                              | No revascularization, 0–3 drugs                                           | 15 (NR)                                                                                             | 174/100                    | NR                                             | NR                                                            |                                                               |
| Englund and Brown, 1991 (16)                                       | Nonrandomized, retrospective | Angioplasty, no stent                                                     | 21 (Study unclear whether 19, 20, or all 21 patients had atherosclerotic renal artery stenosis)     | 165/96                     | NR                                             | 341 (3.9)                                                     | NR                                                            |
|                                                                    |                              | Unspecified drugs                                                         | 17 (17)                                                                                             | 185/101                    | NR                                             | 332 (3.8)                                                     | NR                                                            |
| Pizzolo et al., 2004 (17)¶                                         | Retrospective                | Angioplasty, with or without stent                                        | 63 (63)                                                                                             | 168/95                     | NR                                             | 129 (1.5)                                                     | ~88 (30)                                                      |
|                                                                    |                              | Multiple drug regimens**                                                  | 37 (37)                                                                                             | 159/91                     | NR                                             | 127 (1.4)                                                     | ~79 (27)                                                      |
| <b>Angioplasty versus surgery or medical treatment</b>             |                              |                                                                           |                                                                                                     |                            |                                                |                                                               |                                                               |
| Pillay et al., 2002 (18)                                           | Nonrandomized, prospective   | Various procedures ††                                                     | 12 (NR)                                                                                             | 86 (diastolic)             | NR                                             | 150 (1.7)                                                     | >50 (100)                                                     |
|                                                                    |                              | Unspecified drugs                                                         | 21 (NR)                                                                                             | 90 (diastolic)             | NR                                             | 110 (1.2)                                                     |                                                               |
| Johansson et al., 1999 (19)                                        | Nonrandomized, prospective   | Various procedures††                                                      | 105 (~91)                                                                                           | 179/91                     | 1.0 (61)                                       | —                                                             | 50 (NR)                                                       |
|                                                                    |                              | Unspecified drugs                                                         | 64 (~56)                                                                                            | NR                         | NR                                             | NR                                                            |                                                               |
| <b>Surgery versus medical treatment</b>                            |                              |                                                                           |                                                                                                     |                            |                                                |                                                               |                                                               |
| Uzzo et al., 2002 (20)§§                                           | Randomized trial             | Surgery                                                                   | 25 (25)                                                                                             | NR                         | NR                                             | NR                                                            | 75 (NR)                                                       |
|                                                                    |                              | Unspecified drugs                                                         | 27 (27)                                                                                             | NR                         | NR                                             | NR                                                            |                                                               |

\* NR = not reported; Rx = prescriptions.

† Among participants with both unilateral and bilateral renal artery stenosis, congestive heart failure occurred in 9% of those who received angioplasty and 13% of those who received medical treatment alone, and stroke occurred in 4% and 13%, respectively. Myocardial infarction occurred in 4% of patients who received angioplasty and in an unclear proportion of those who received medical treatment alone.

‡ Alternatively, patients received furosemide, methyl dopa, or prazosin. Angiotensin-converting enzyme inhibitors were not allowed.

§ Target diastolic blood pressure < 95 mm Hg; if necessary, atenolol (50 mg), furosemide (40 mg), or enalapril (10 mg) was used.

¶ Twenty-two of 50 patients assigned to medical therapy received angioplasty at 3 months because of persistent hypertension or deterioration of kidney function. These patients were originally assigned to receive amlodipine, 10 mg (plus atenolol, 50 mg if > 40 years of age), or enalapril, 20 mg (plus hydrochlorothiazide, 25 mg if > 40 years of age), or if neither regimen was tolerated, atenolol, 100 mg (plus hydrochlorothiazide, 25 mg if > 40 years of age).

Table 3—Continued

| Location of Stenosis (Percentage of Patients) | Years in Which Patients Were Enrolled | Mean Study Duration (Range) | Results                                                                                                                     |                                                                                                                    | Study Quality | Applicability of Results |
|-----------------------------------------------|---------------------------------------|-----------------------------|-----------------------------------------------------------------------------------------------------------------------------|--------------------------------------------------------------------------------------------------------------------|---------------|--------------------------|
|                                               |                                       |                             | Blood Pressure                                                                                                              | Kidney Function                                                                                                    |               |                          |
| Ostial (46)                                   | NR                                    | NR (3–54 months)            | Decrease, 34/11 mm Hg                                                                                                       | Creatinine increase, 10 $\mu\text{mol/L}$ ; 8% developed "renal failure" <sup>††</sup>                             | Fair          | Moderate                 |
|                                               |                                       |                             | Decrease, 8/1 mm Hg ( $P < 0.005$ [net]); total Rx change not significant (net)                                             | Creatinine increase, 4 $\mu\text{mol/L}$ ; not significant (net); 7% developed "renal failure" <sup>††</sup>       |               |                          |
| Ostial (52)                                   |                                       |                             | Decrease, 2/2 mm Hg                                                                                                         | Creatinine increase, 8 $\mu\text{mol/L}$                                                                           |               |                          |
|                                               |                                       |                             | Decrease, 10/2 mm Hg (not significant [net]); total Rx change not significant (net)                                         | Creatinine change, 0 $\mu\text{mol/L}$ ; not significant (net)                                                     |               |                          |
| Ostial (39)                                   | 1992–1999                             | 6 months                    | Decrease, 14/8 mm Hg; total Rx at end, 1.0                                                                                  | No patient had worsened kidney function; increase in creatinine clearance, 0.06 mL/s                               | Fair          | Low                      |
|                                               |                                       |                             | Decrease, 7/1 mm Hg ( $P =$ not significant/0.04 [net]); total Rx at end, 1.8 ( $P = 0.009$ [net])                          | 1 of 19 patients had worsened kidney function; increase in creatinine clearance, 0.01 mL/s (not significant [net]) |               |                          |
| NR                                            | 1993–1998                             | 1 year                      | Decrease, 19/12 mm Hg; total Rx decrease, 0.8                                                                               | Worsened in 4%; increase in creatinine clearance, 0.05 mL/s                                                        | Moderate      | High                     |
|                                               |                                       |                             | Decrease, 17/7 mm Hg (not significant [net]); total Rx decrease, 0.1 ( $P = 0.10$ [net])                                    | Worsened in 12%; increase in creatinine clearance, 0.03 mL/s (not significant [net])                               |               |                          |
| Ostial (63)                                   | NR                                    | 3–54 months                 | Decrease, 13/11 mm Hg; total Rx decrease, 0.5 (not significant [net])                                                       | Creatinine increase, 13 $\mu\text{mol/L}$                                                                          | Moderate      | Low                      |
|                                               |                                       |                             | Decrease, 12/6 mm Hg; total Rx increase, 0.3 ( $P = 0.01$ [from baseline])                                                  | Creatinine increase, 5 $\mu\text{mol/L}$ (not significant [net])                                                   |               |                          |
| NR                                            | NR                                    | 6.5 months (1–21 months)    | Decrease, 23/6 mm Hg; total Rx decrease, 1; no data on change in blood pressure status                                      | Creatinine decrease, 44 $\mu\text{mol/L}$ (including 7 patients who had surgery)                                   | Poor          | Low                      |
|                                               |                                       | 13 months (7–20 months)     | Decrease, 24/20 mm Hg; total Rx change, 0; 20% had unchanged blood pressure                                                 | Creatinine increase, 88 $\mu\text{mol/L}$ ( $P < 0.01$ [net])                                                      |               |                          |
| NR                                            | 1981–1988                             | NR                          | Decrease, 9/5 mm Hg; total Rx decrease, 1; no patient cured of hypertension                                                 | Creatinine increase, 93 $\mu\text{mol/L}$                                                                          | Poor          | Low                      |
| NR                                            | NR                                    | 16 months (NR)              | Decrease, 24/12 mm Hg (not significant [net]); total Rx change, 0 (not significant [net]); no patient cured of hypertension | Creatinine increase, 61 $\mu\text{mol/L}$ (not significant [net])                                                  |               |                          |
| NR                                            | 1996–2002                             | 28 months (1–60 months)     | 0% cured of hypertension, 57% improved, 43% unchanged                                                                       | 82% improved, 18% worse                                                                                            | Poor          | Low                      |
| NR                                            |                                       |                             | 0% cured of hypertension, 29% improved, 71% unchanged                                                                       | 52% improved, 48% worse                                                                                            |               |                          |
| NR                                            | 1994–1998                             | 2.5 years (>2 years)        | Decrease, 15 mm Hg; total Rx increase, 0.03                                                                                 | Creatinine increase, 53 $\mu\text{mol/L}$ ( $P = 0.01$ [from baseline]); 1 patient required dialysis               | Poor          | Low                      |
|                                               |                                       |                             | Decrease, 6 mm Hg (not significant [net]); total Rx increase, 0.13 (not significant [net])                                  | No creatinine change (not significant [from baseline]); no patient required dialysis                               |               |                          |
| NR                                            | 1983–1984 and 1988–1994               | 7.1 years (NR)              | 53% cured of hypertension at 1 year                                                                                         | NR                                                                                                                 | Poor          | Low                      |
|                                               |                                       |                             | NR                                                                                                                          | NR                                                                                                                 |               |                          |
| NR                                            | NR                                    | 6.2 years (up to 7 years)   | No difference in "blood pressure control" (not significant)                                                                 | No difference in dialysis-free survival or change in glomerular filtration rate (not significant)                  | Poor          | Low                      |

¶ Entry criteria differed markedly for patients receiving angioplasty and those receiving medical therapy. Patients receiving angioplasty had primary evaluation for resistant hypertension or unexplained azotemia. Patients receiving conservative therapy had angiographic evaluation for other causes, primarily lower-extremity arteriopathy. Endovascular therapy not considered for this latter group.

\*\* Target blood pressure  $\leq 140/90$  mm Hg. The most frequently used classes of drugs were angiotensin-converting enzyme inhibitors (62% of patients), diuretics (62%), calcium antagonists (49%), and  $\beta$ -blockers (30%).

†† Among 12 patients, "9 [had] angioplasties (1 failure) and 1 [had] bilateral stent. 4 kidneys had . . . surgery."

‡‡ Eighty-eight patients had angioplasty and 17 had reconstructive surgery or nephrectomy.

§§ The stopping point (diastolic blood pressure  $> 100$  mm Hg during treatment or worsening kidney function [including need for dialysis] or occurrence of an atherosclerotic cardiovascular event or death) was reached in 68% of patients after surgery and 67% of those receiving medical treatment (not statistically significant).
