# Supplementary material
Source: HighWire-hosted journal article supplement (https://www.annals.org/content/suppl/2006/12/08/145.12.901)
Supplement: Balk_DB_145-12-901-DC1-4.pdf [file Balk_DB_145-12-901-DC1-4.pdf]

**Table 4. Baseline Factors as Predictors of Treatment Outcomes**

| Baseline Factor                            | Treatment                                  | Strength of Evidence | Studies (Participants), n (n) |                           |                | Conclusions                                                                                                                                                                                                                                                                                     |
|--------------------------------------------|--------------------------------------------|----------------------|-------------------------------|---------------------------|----------------|-------------------------------------------------------------------------------------------------------------------------------------------------------------------------------------------------------------------------------------------------------------------------------------------------|
|                                            |                                            |                      | Randomized Trials             | Other Comparative Studies | Cohort Studies |                                                                                                                                                                                                                                                                                                 |
| Diagnostic tests                           | Revascularization                          | Weak                 |                               | 1 (106)                   | 2 (354)        | Captopril testing and renography (scintigraphy) did not predict outcomes after angioplasty (1 study); disagreement about whether elevated resistance index predicted outcomes after angioplasty (2 studies)                                                                                     |
|                                            | Medical treatment                          | Weak                 |                               |                           | 1 (45)         | Nonspiral flow on magnetic resonance angiography predicted progression of kidney function worsening                                                                                                                                                                                             |
| Bilateral disease (vs. unilateral disease) | Revascularization versus medical treatment | Weak                 | 1 (55)                        | 1 (106)                   |                | Greater blood pressure improvement and possibly better kidney function after angioplasty compared with medical treatment, in contrast to patients with unilateral disease                                                                                                                       |
|                                            | Revascularization                          | Weak                 |                               |                           | 7 (1999)       | Disagreement about whether patients with bilateral disease had a reduced mortality rate or better kidney and blood pressure outcomes                                                                                                                                                            |
|                                            | Medical treatment                          | Weak                 |                               |                           | 2 (116)        | No difference in kidney outcomes, but higher mortality rate with bilateral disease                                                                                                                                                                                                              |
| Baseline kidney function                   | Revascularization versus medical treatment | Weak                 |                               | 1 (52)                    |                | Among patients with elevated serum creatinine concentrations, surgical revascularization resulted in a lower mortality rate than did medical treatment alone                                                                                                                                    |
|                                            | Revascularization                          | Acceptable           |                               | 2 (269)                   | 12 (2246)      | Poorer kidney function predicted a higher mortality rate, poorer clinical outcomes (including cardiovascular events), and poorer blood pressure control after angioplasty; studies disagreed about whether baseline kidney function predicted improvements in kidney function after angioplasty |
|                                            | Medical treatment                          | Weak                 |                               | 1 (52)                    | 1 (26)         | Poorer kidney function predicted higher mortality and dialysis rates but not changes in blood pressure                                                                                                                                                                                          |
| Baseline percent stenosis                  | Revascularization                          | Weak                 | 1 (55)                        | 2 (185)                   | 2 (471)        | Disagreement about whether the percentage of stenosis predicted blood pressure or kidney outcomes after angioplasty                                                                                                                                                                             |
|                                            | Medical treatment                          | Weak                 | 1 (55)                        | 1 (52)                    | 1 (362)        | Reduced survival, but no effect on blood pressure or kidney function                                                                                                                                                                                                                            |
| Baseline cardiovascular disease            | Revascularization                          | Acceptable           |                               | 2 (269)                   | 5 (1454)       | Patients with cardiovascular disease had increased mortality rates and worse kidney function after angioplasty                                                                                                                                                                                  |
|                                            | Medical treatment                          | Weak                 |                               | 2 (269)                   | 1 (362)        | Disagreement about whether cardiovascular disease predicts death                                                                                                                                                                                                                                |
| Demographic characteristics                | Revascularization                          | Weak                 | 1 (55)                        | 3 (348)                   | 2 (561)        | Disagreement about whether outcomes differed by sex or age of patients                                                                                                                                                                                                                          |
|                                            | Medical treatment                          | Weak                 | 1 (55)                        | 3 (348)                   | 1 (362)        | Disagreement about whether outcomes differed by sex or age of patients                                                                                                                                                                                                                          |
| Stent placement                            | Revascularization                          | Weak                 |                               |                           | 2 (269)        | No difference in blood pressure and kidney outcomes between patients who had stents placed and those who did not                                                                                                                                                                                |
